# Supplementary material
Source: publisher figshare collection journal article supplement (https://acs.figshare.com/ndownloader/files/3730663)

# Cooperativity and Site-Selectivity of Intramolecular Hydrogen Bonds on the Fluorescence Quenching of Modified GFP Chromophores

*Deng-Hsiang Chang,<sup>†</sup> Chun-Lin Ou,<sup>†</sup> Hung-Yu Hsu,<sup>‡</sup> Guan-Jhih Huang,<sup>†</sup> Cheng-Yi Kao,<sup>†</sup> Yi-Hung Liu,<sup>†</sup> Shie-Ming Peng,<sup>†</sup> Eric Wei-Guang Diau,<sup>‡</sup> and Jye-Shane Yang<sup>\*,†</sup>*

<sup>†</sup>Department of Chemistry, National Taiwan University, Taipei 10617, Taiwan

<sup>‡</sup>Department of Applied Chemistry and Institute of Molecular Science, National Chiao Tung University, Hsinchu 30010, Taiwan

[jsyang@ntu.edu.tw](mailto:jsyang@ntu.edu.tw)

(Supporting Information 18 pages)

## Table of contents:

|                                                                                                         |        |
|---------------------------------------------------------------------------------------------------------|--------|
| Normalized absorption and emission spectra of <b>1OH–3OH</b> and <b>1OMe–3OMe</b> in CH <sub>3</sub> CN | S2     |
| Normalized absorption spectra of <b>1OH–3OH</b> in MeOH                                                 | S3     |
| Normalized fluorescence spectra of <b>1OH–3OH</b> and <b>1OMe–3OMe</b> in methylcyclohexane             | S4     |
| Crystallographic data of <b>1OH</b> , <b>2OH</b> and <b>3OH</b>                                         | S5-6   |
| Thermal ellipsoid plots for <b>1OH</b> , <b>2OH</b> and <b>3OH</b>                                      | S7-9   |
| Unit cell packing of <b>1OH</b> , <b>2OH</b> and <b>3OH</b>                                             | S10-12 |
| <sup>1</sup> H and <sup>13</sup> C NMR spectra of <b>4</b>                                              | S13-14 |
| <sup>1</sup> H and <sup>13</sup> C NMR spectra of <b>3OMe</b>                                           | S15-16 |
| <sup>1</sup> H and <sup>13</sup> C NMR spectra of <b>3OH</b>                                            | S17-18 |

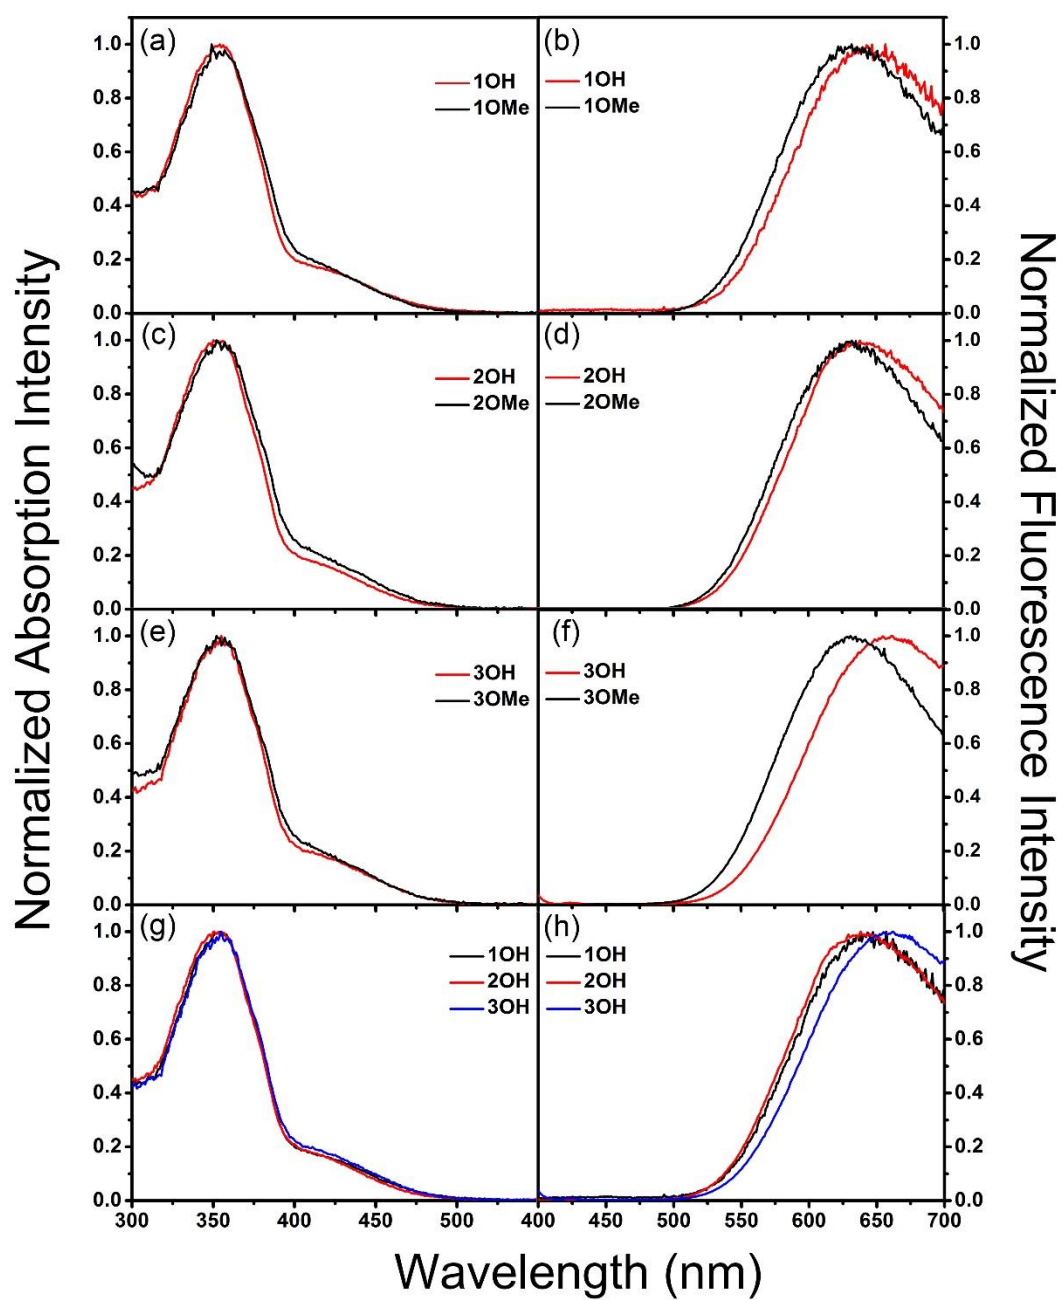

**Figure S1.** Normalized absorption and emission spectra of **1OH–3OH** and **1OMe–3OMe** in  $\text{CH}_3\text{CN}$ .

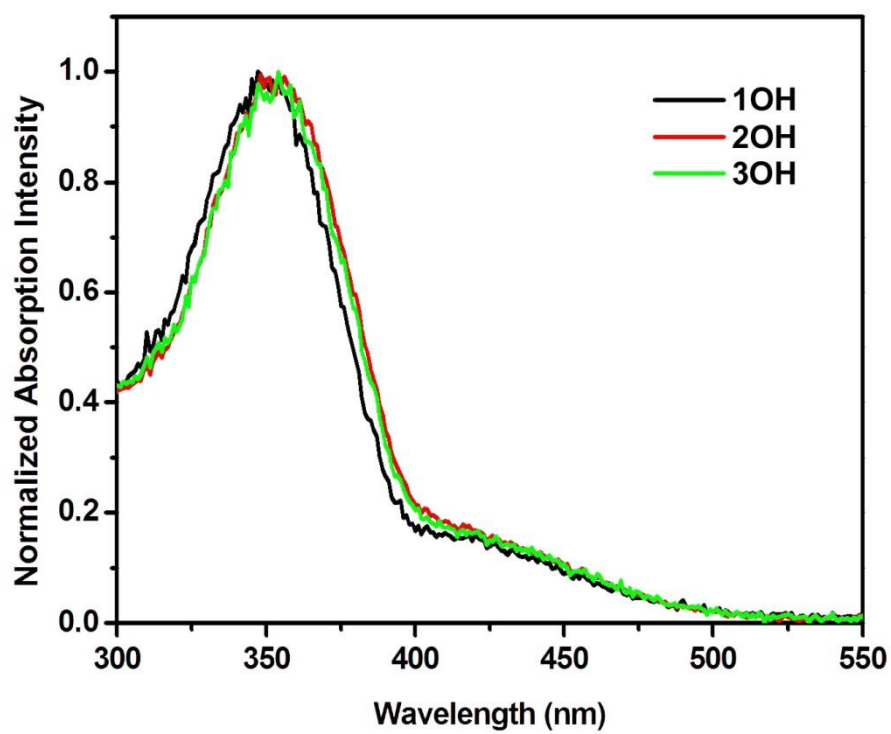

**Figure S2.** Normalized absorption spectra of **1OH–3OH** in MeOH.

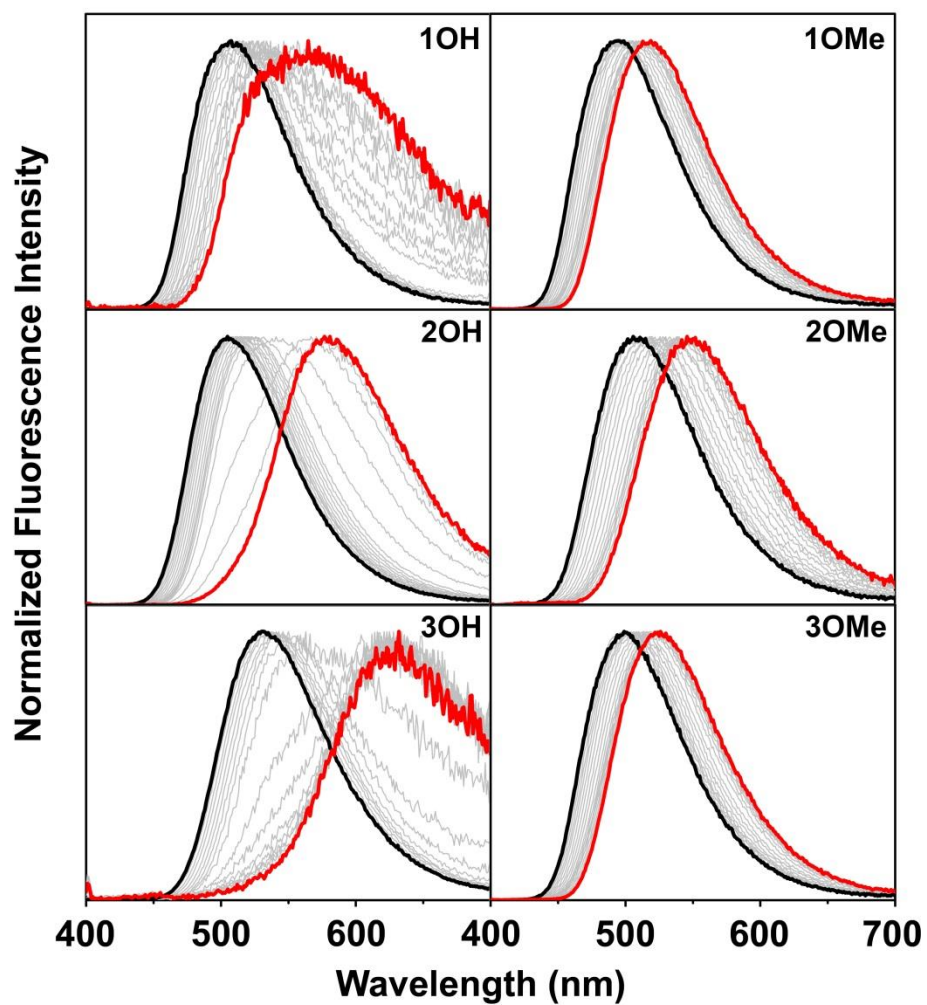

**Figure S3.** Normalized fluorescence spectra of **1OH–3OH** and **1OMe–3OMe** in methylcyclohexane. The spectra were recorded from 298 K (black) to 128 K (red). excitation wavelength is 350 nm.

**Table S1.** Crystallographic data of **1OH–3OH**.

|                                 | <b>1OH</b>                                                    | <b>2OH</b>                                                    | <b>3OH</b>                                                    |
|---------------------------------|---------------------------------------------------------------|---------------------------------------------------------------|---------------------------------------------------------------|
| Empirical formula               | C <sub>15</sub> H <sub>19</sub> N <sub>3</sub> O <sub>2</sub> | C <sub>16</sub> H <sub>21</sub> N <sub>3</sub> O <sub>2</sub> | C <sub>17</sub> H <sub>23</sub> N <sub>3</sub> O <sub>3</sub> |
| Formula weight                  | 273.33                                                        | 287.36                                                        | 317.38                                                        |
| Temperature                     | 295(2) K                                                      | 295(2) K                                                      | 200(2) K                                                      |
| Wavelength                      | 1.54178 Å                                                     | 1.54178 Å                                                     | 1.54178 Å                                                     |
| Crystal system                  | Monoclinic                                                    | Triclinic                                                     | Monoclinic                                                    |
| Space group                     | P2(1)                                                         | P-1                                                           | P2 <sub>1</sub> /n                                            |
| Unit cell dimensions            | a = 9.4598(2) Å<br>α = 90°                                    | a = 7.4623(8) Å<br>α = 100.622(9)°                            | a = 9.3568(4) Å<br>α = 90°                                    |
|                                 | b = 7.61760(10) Å<br>β = 95.575(2)°                           | b = 7.9403(9) Å<br>β = 92.419(9)°                             | b = 15.0678(6) Å<br>β = 100.597(4)°                           |
|                                 | c = 10.0179(2) Å<br>γ = 90°                                   | c = 14.3735(15) Å<br>γ = 112.362(10)°                         | c = 11.9128(5) Å<br>γ = 90°                                   |
| Volume, Z                       | 718.48(2) Å <sup>3</sup> , 2                                  | 768.19(14) Å <sup>3</sup> , 2                                 | 1650.90(12) Å <sup>3</sup> , 4                                |
| Density (calculated)            | 1.263 Mg/m <sup>3</sup>                                       | 1.242 Mg/m <sup>3</sup>                                       | 1.277 Mg/m <sup>3</sup>                                       |
| Absorption coefficient          | 0.693 mm <sup>-1</sup>                                        | 0.671 mm <sup>-1</sup>                                        | 0.721 mm <sup>-1</sup>                                        |
| F(0 0 0)                        | 292                                                           | 308                                                           | 680                                                           |
| Crystal size (mm <sup>3</sup> ) | 0.25 x 0.20 x 0.15                                            | 0.25 x 0.20 x 0.15                                            | 0.20 x 0.15 x 0.10                                            |
| Θ range for data collection     | 4.43 to 67.97°                                                | 3.15 to 68.00°                                                | 4.78 to 67.99°                                                |
| Limiting indices                | -10 ≤ h ≤ 11,<br>-9 ≤ k ≤ 9,<br>-11 ≤ l ≤ 12                  | -8 ≤ h ≤ 8,<br>-8 ≤ k ≤ 9,<br>-17 ≤ l ≤ 15                    | -11 ≤ h ≤ 10,<br>-18 ≤ k ≤ 17,<br>-14 ≤ l ≤ 11                |
| Reflections collection          | 4668                                                          | 5153                                                          | 6078                                                          |
| Independent reflections         | 2566 [R(int) = 0.0143]                                        | 2781 [R(int) = 0.0352]                                        | 3005 [R(int) = 0.0225]                                        |
| Completeness to Θ = 67.99°      | 100.0 %                                                       | 99.5 %                                                        | 99.8 %                                                        |
| Absorption correction           | Semi-empirical from equivalents                               | Semi-empirical from equivalents                               | Semi-empirical from equivalents                               |

|                                      |                                       |                                       |                                       |
|--------------------------------------|---------------------------------------|---------------------------------------|---------------------------------------|
| Max. and min. transmission           | 1.00000 and 0.75593                   | 1.00000 and 0.58358                   | 1.00000 and 0.90285                   |
| Refinement method                    | Full-matrix least-squares on $F^2$    | Full-matrix least-squares on $F^2$    | Full-matrix least-squares on $F^2$    |
| Data / restraints / parameters       | 2566 / 1 / 185                        | 2781 / 2 / 193                        | 3005 / 1 / 217                        |
| Goodness-of-fit on $F^2$             | 0.786                                 | 1.168                                 | 1.014                                 |
| Final R indices [ $I > 2\sigma(I)$ ] | R1 = 0.0365, wR2 = 0.1129             | R1 = 0.0881, wR2 = 0.2219             | R1 = 0.0595, wR2 = 0.1673             |
| R indices (all data)                 | R1 = 0.0373, wR2 = 0.1146             | R1 = 0.1336, wR2 = 0.2529             | R1 = 0.0723, wR2 = 0.1793             |
| Largest diff. peak and hole          | 0.183 and -0.161 e. $\text{\AA}^{-3}$ | 0.542 and -0.313 e. $\text{\AA}^{-3}$ | 0.772 and -0.262 e. $\text{\AA}^{-3}$ |

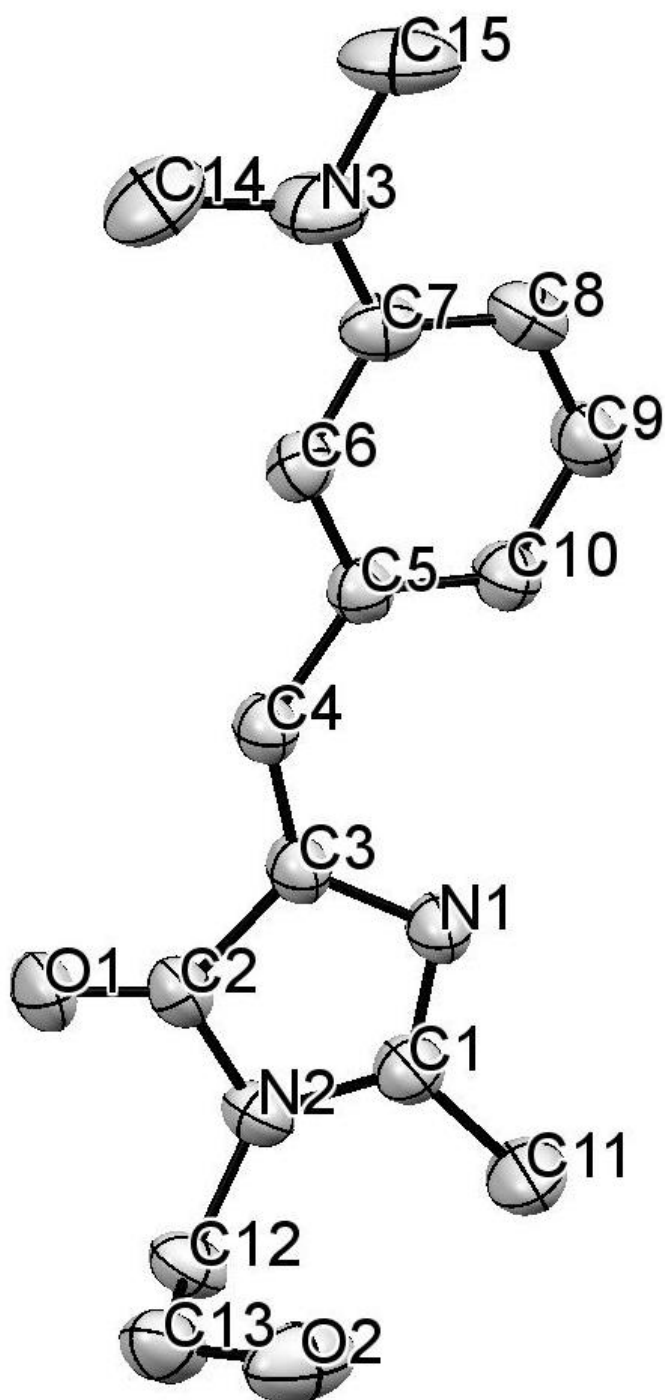

**Figure S4.** Thermal ellipsoid plot (30%) of the crystal of **1OH**. Hydrogen atoms are omitted for clarity.

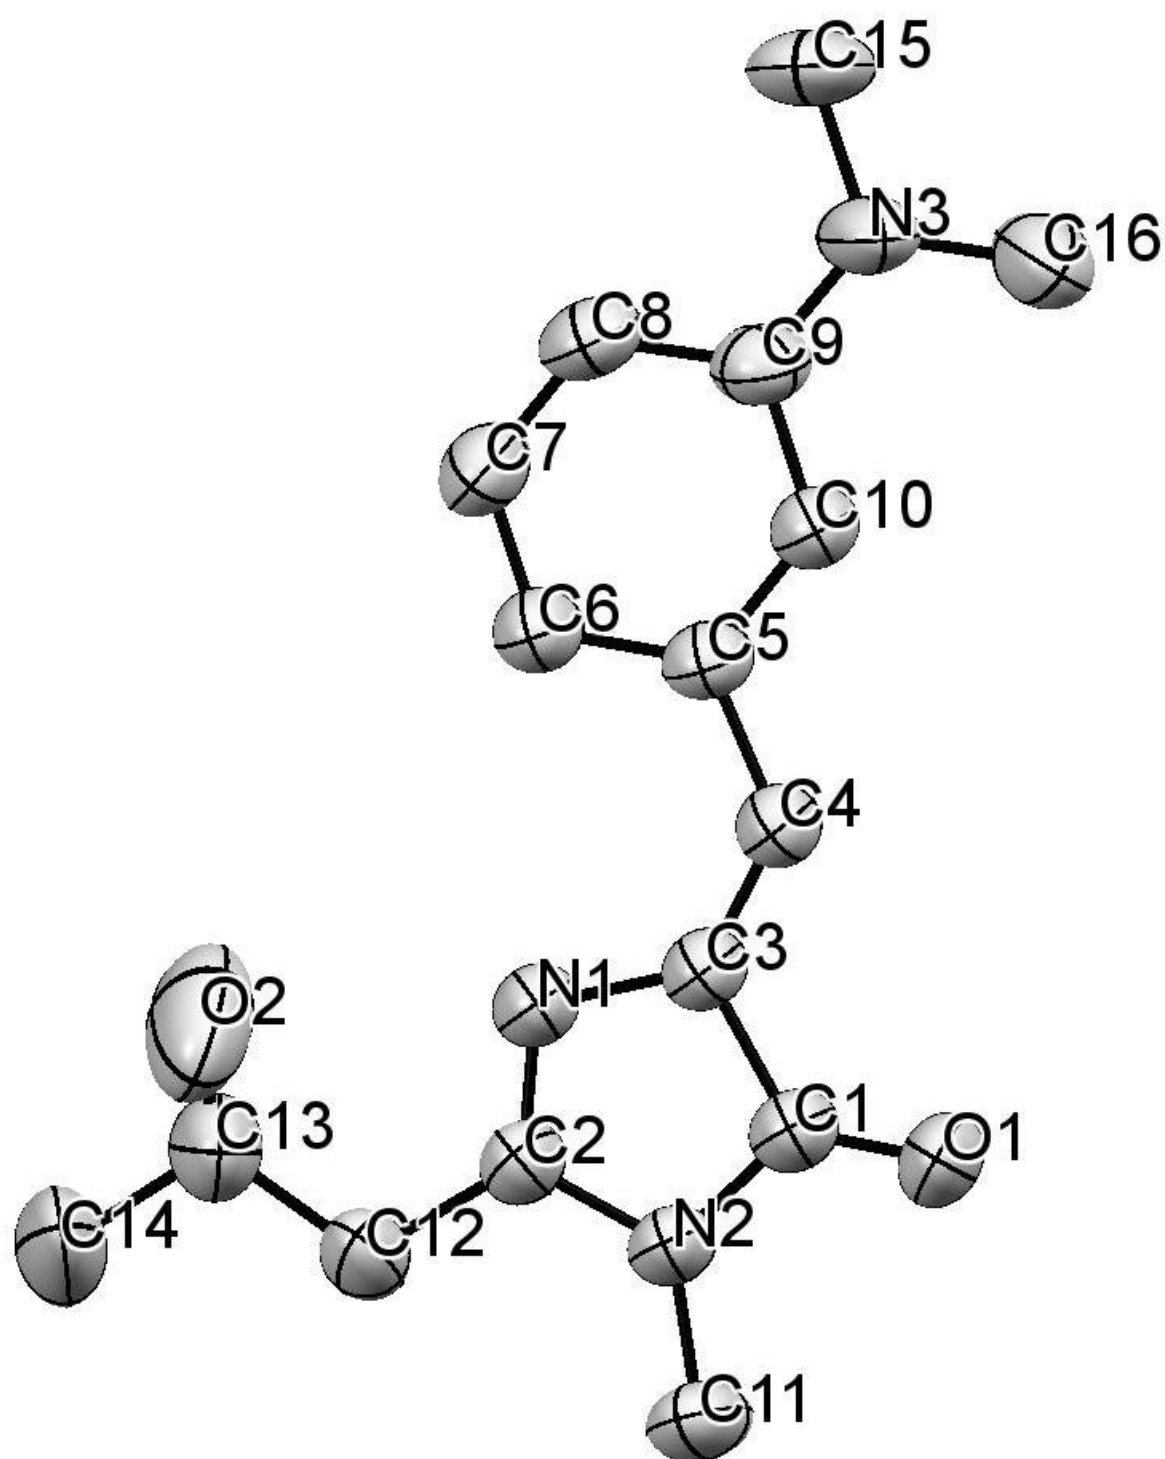

**Figure S5.** Thermal ellipsoid plot (30%) of the crystal of **2OH**. Hydrogen atoms are omitted for clarity.



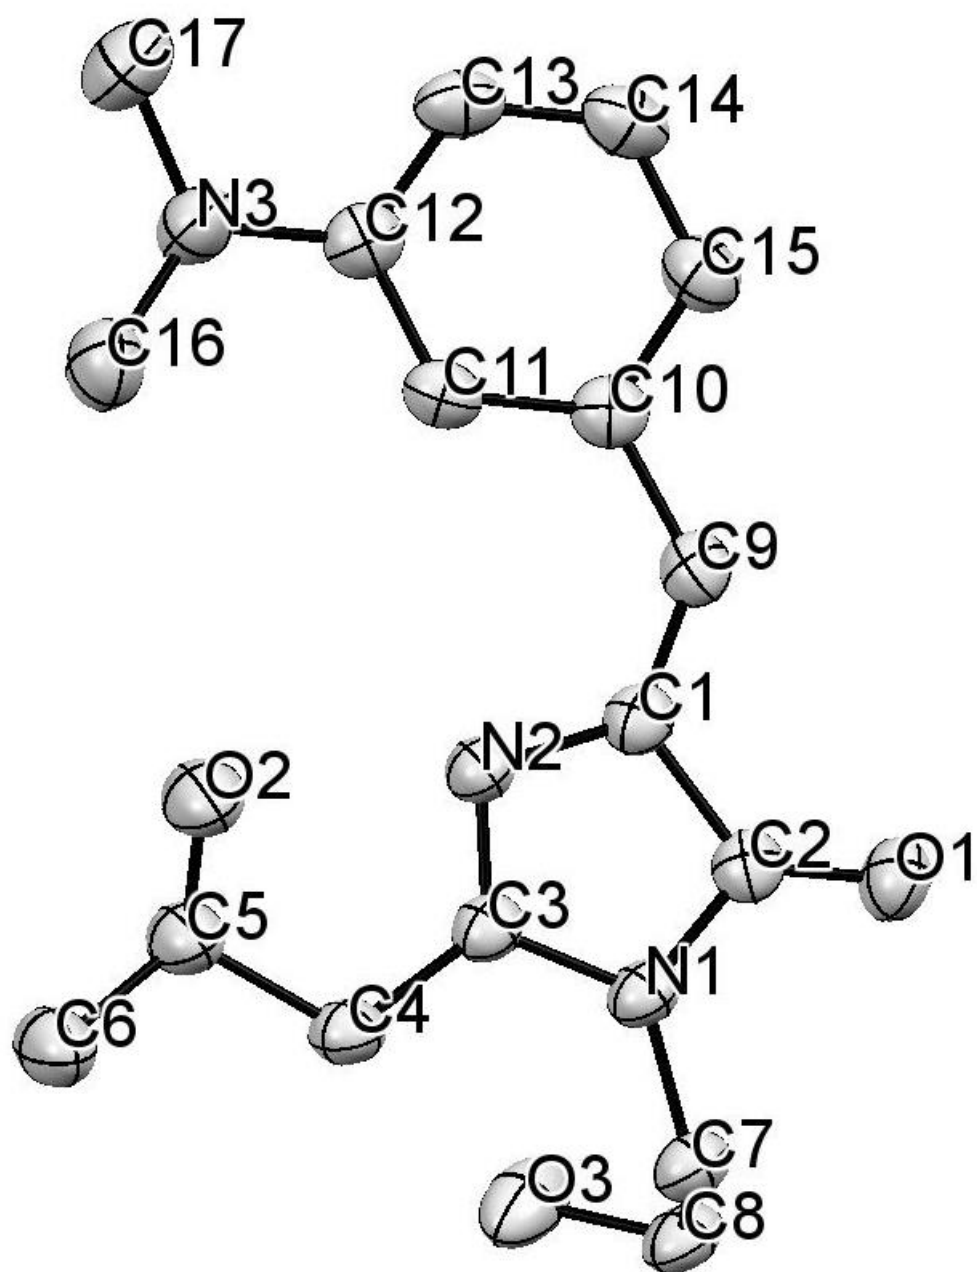

**Figure S6.** Thermal ellipsoid plot (30%) of the crystal of **3OH**. Hydrogen atoms are omitted for clarity.

**Figure S7.** Unit cell packing of **10H**.

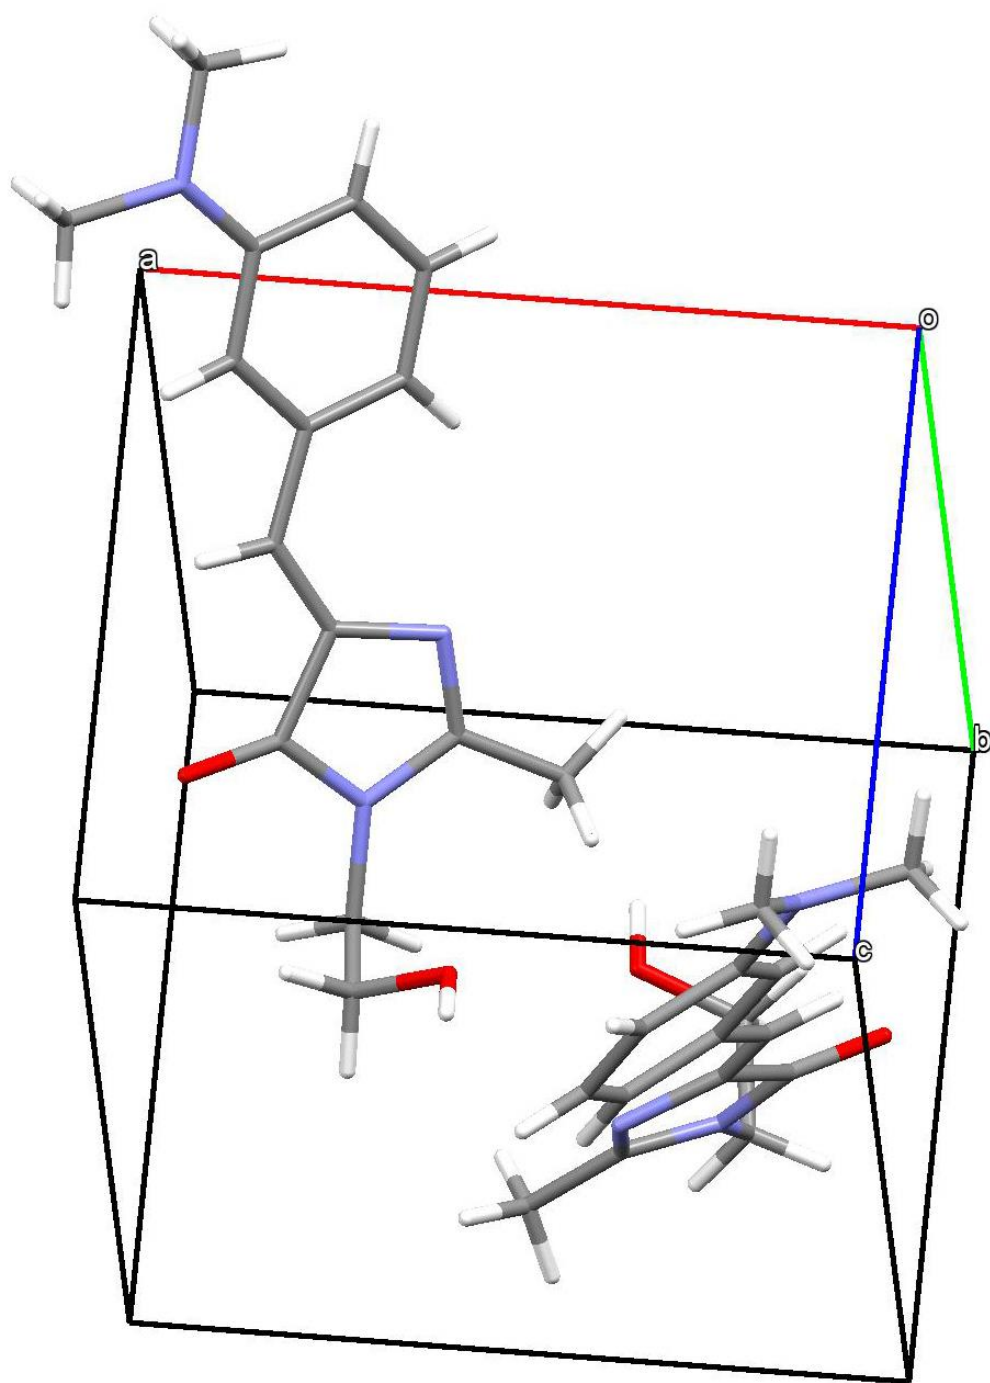

**Figure S8.** Unit cell packing of **2OH**.

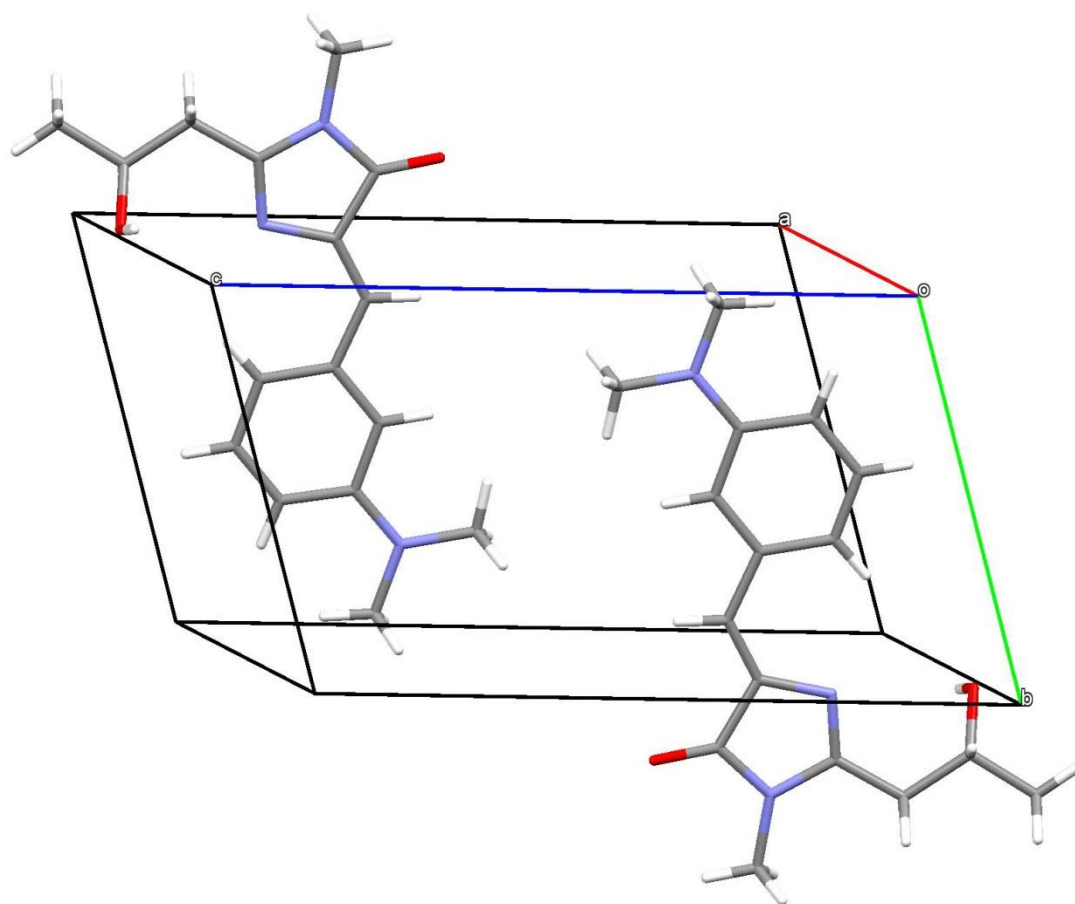

**Figure S9.** Unit cell packing of **3OH**.

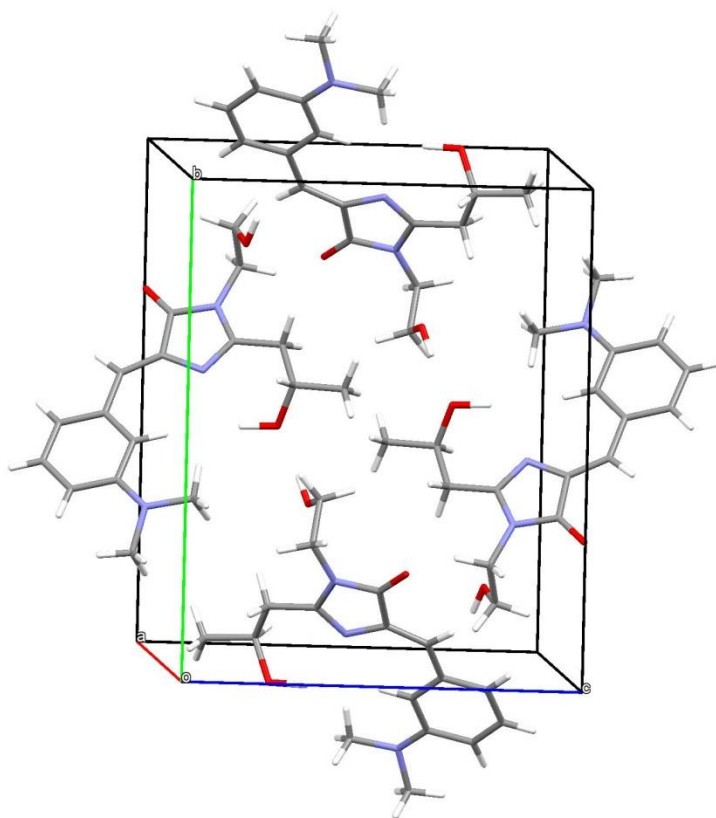

**Figure S10.**  $^1\text{H}$  NMR spectra of **4** in  $\text{CDCl}_3$ .

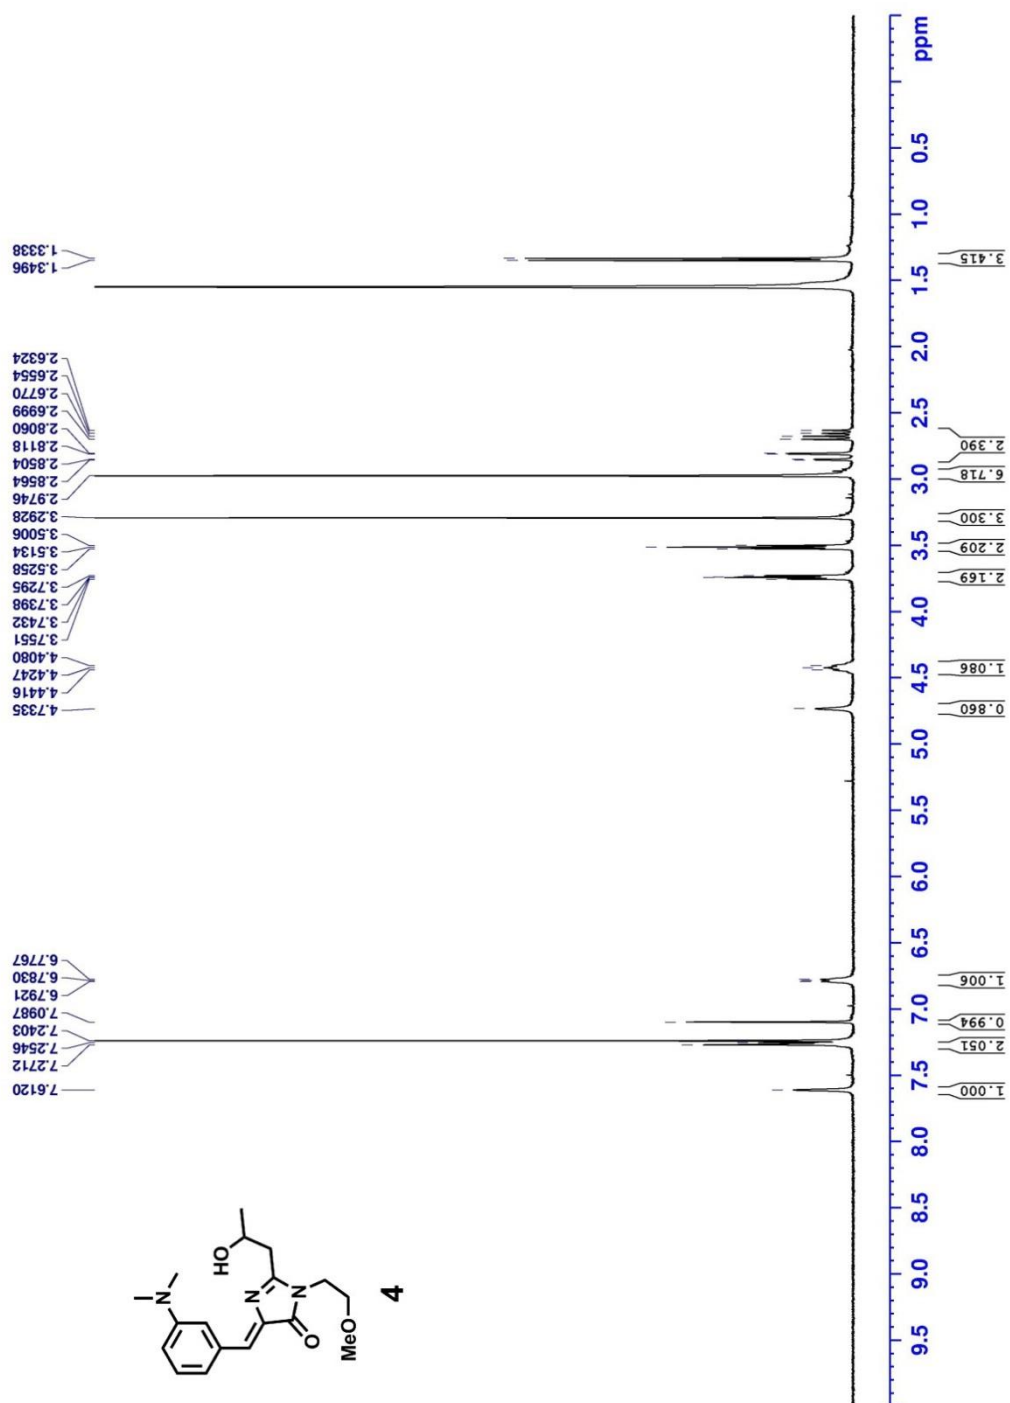

**Figure S11.**  $^{13}\text{C}$  NMR spectra of **4** in  $\text{CDCl}_3$ .

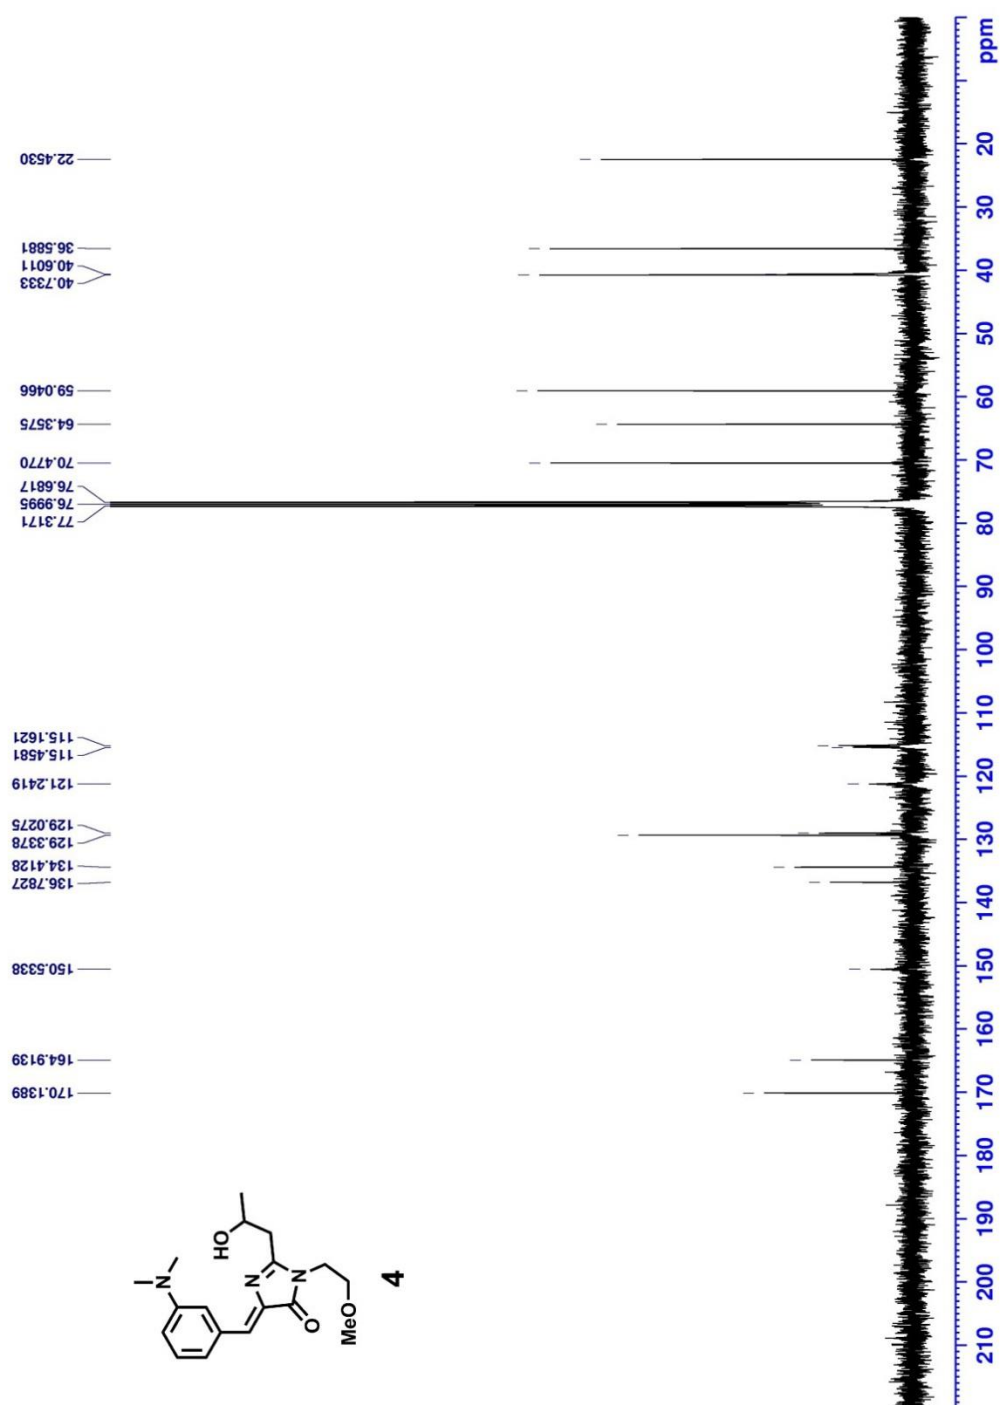

**Figure S12.**  $^1\text{H}$  NMR spectra of **3OMe** in  $\text{CDCl}_3$ .

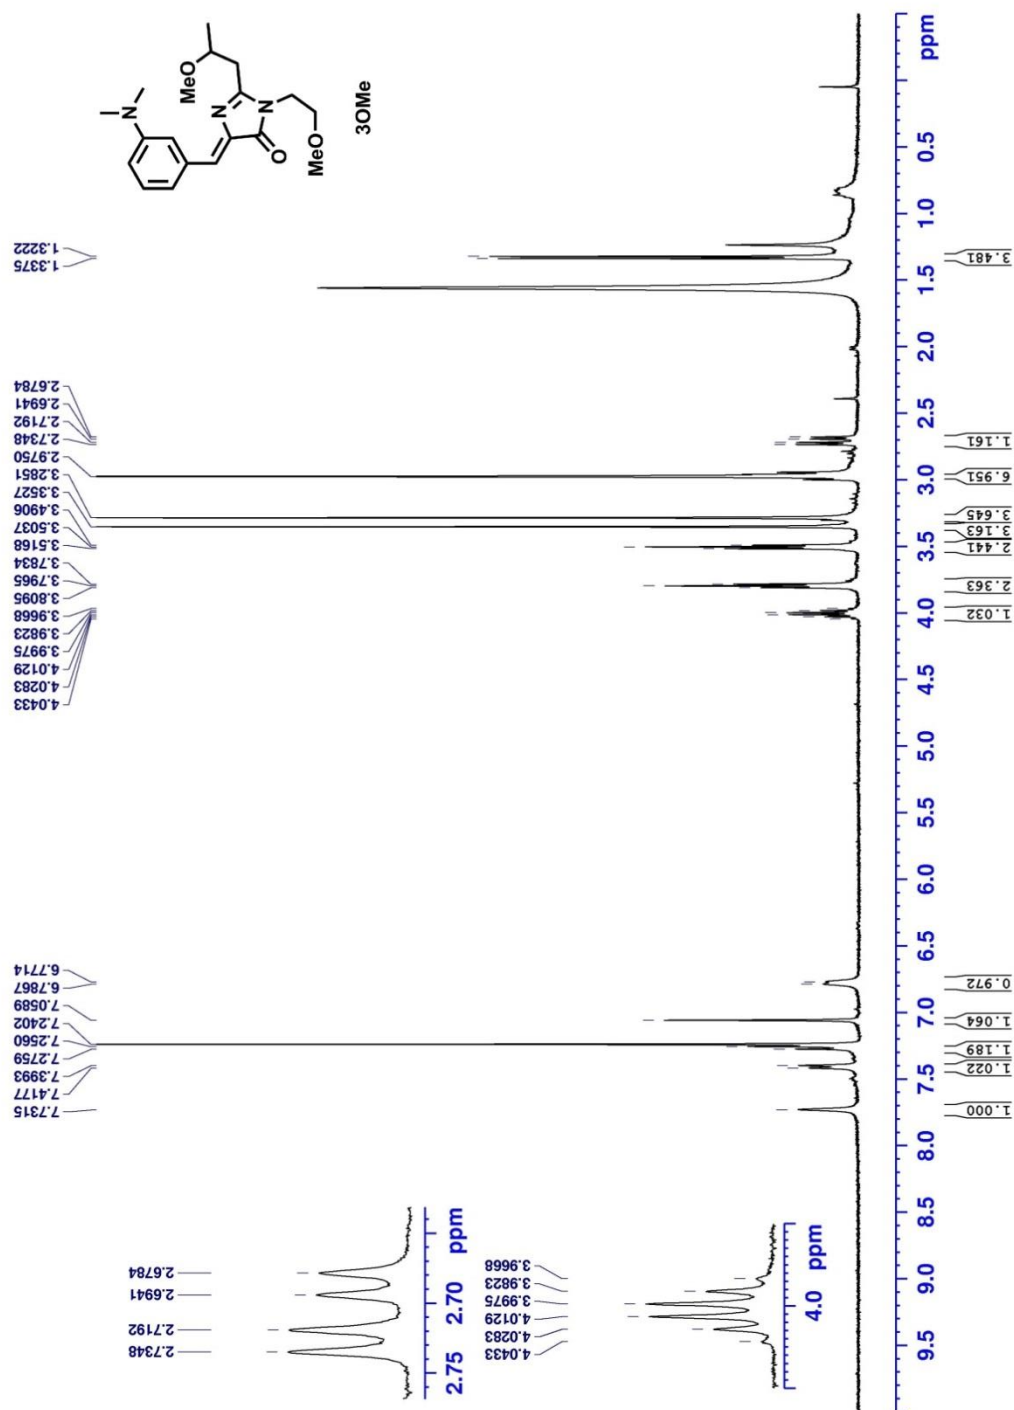

**Figure S13.**  $^{13}\text{C}$  NMR spectra of **3OMe** in  $\text{CDCl}_3$ .

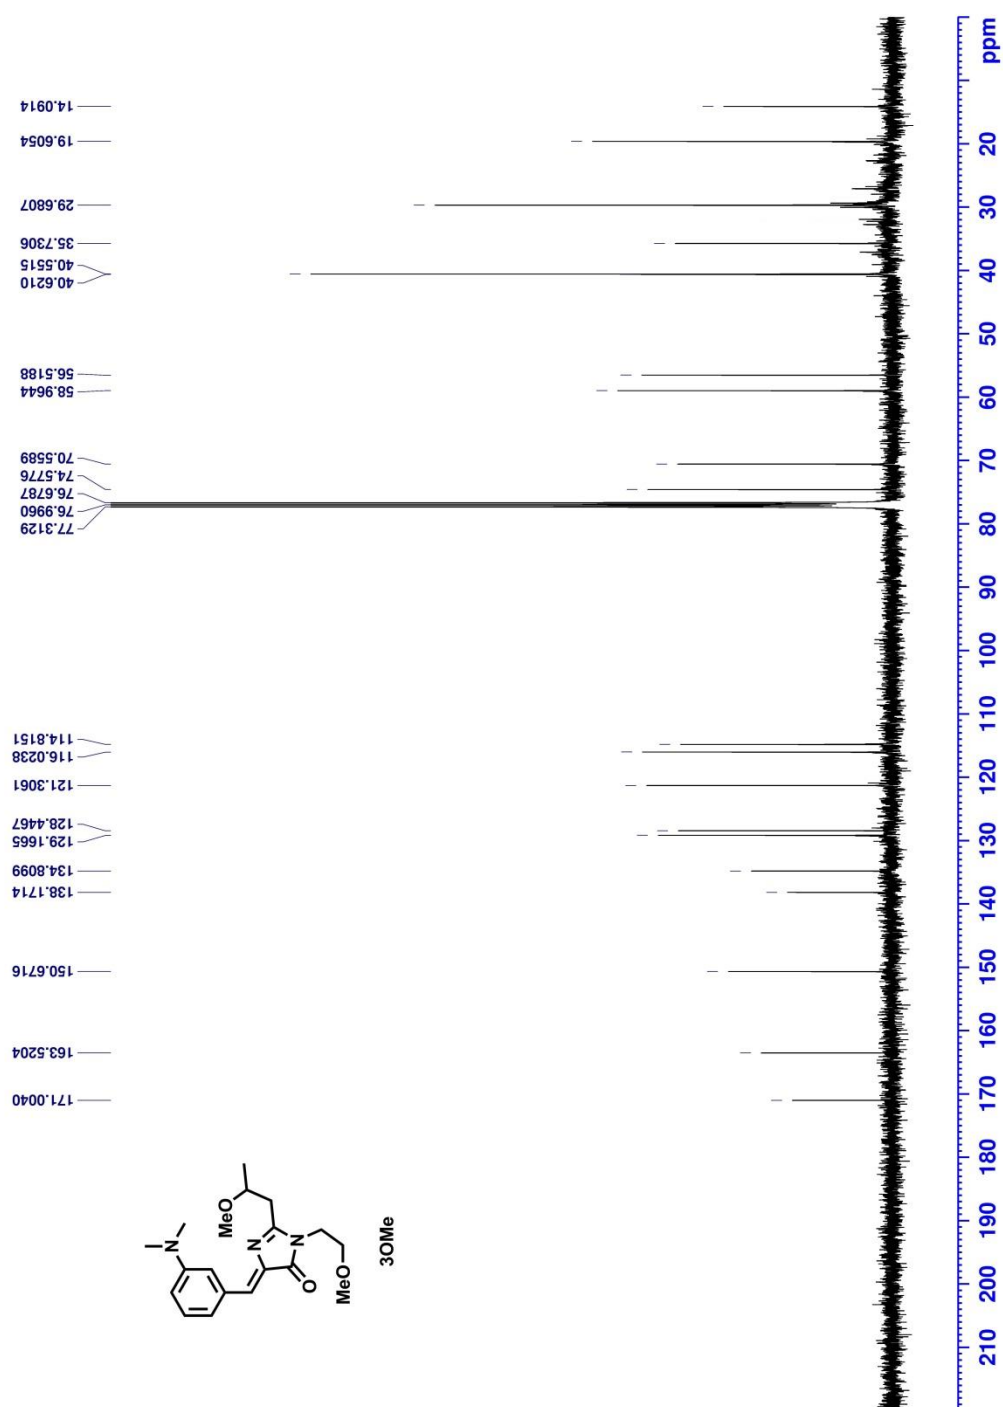



**Figure S7.**  $^1\text{H}$  NMR spectra of **3OH** in  $\text{DMSO-}d_6$ .

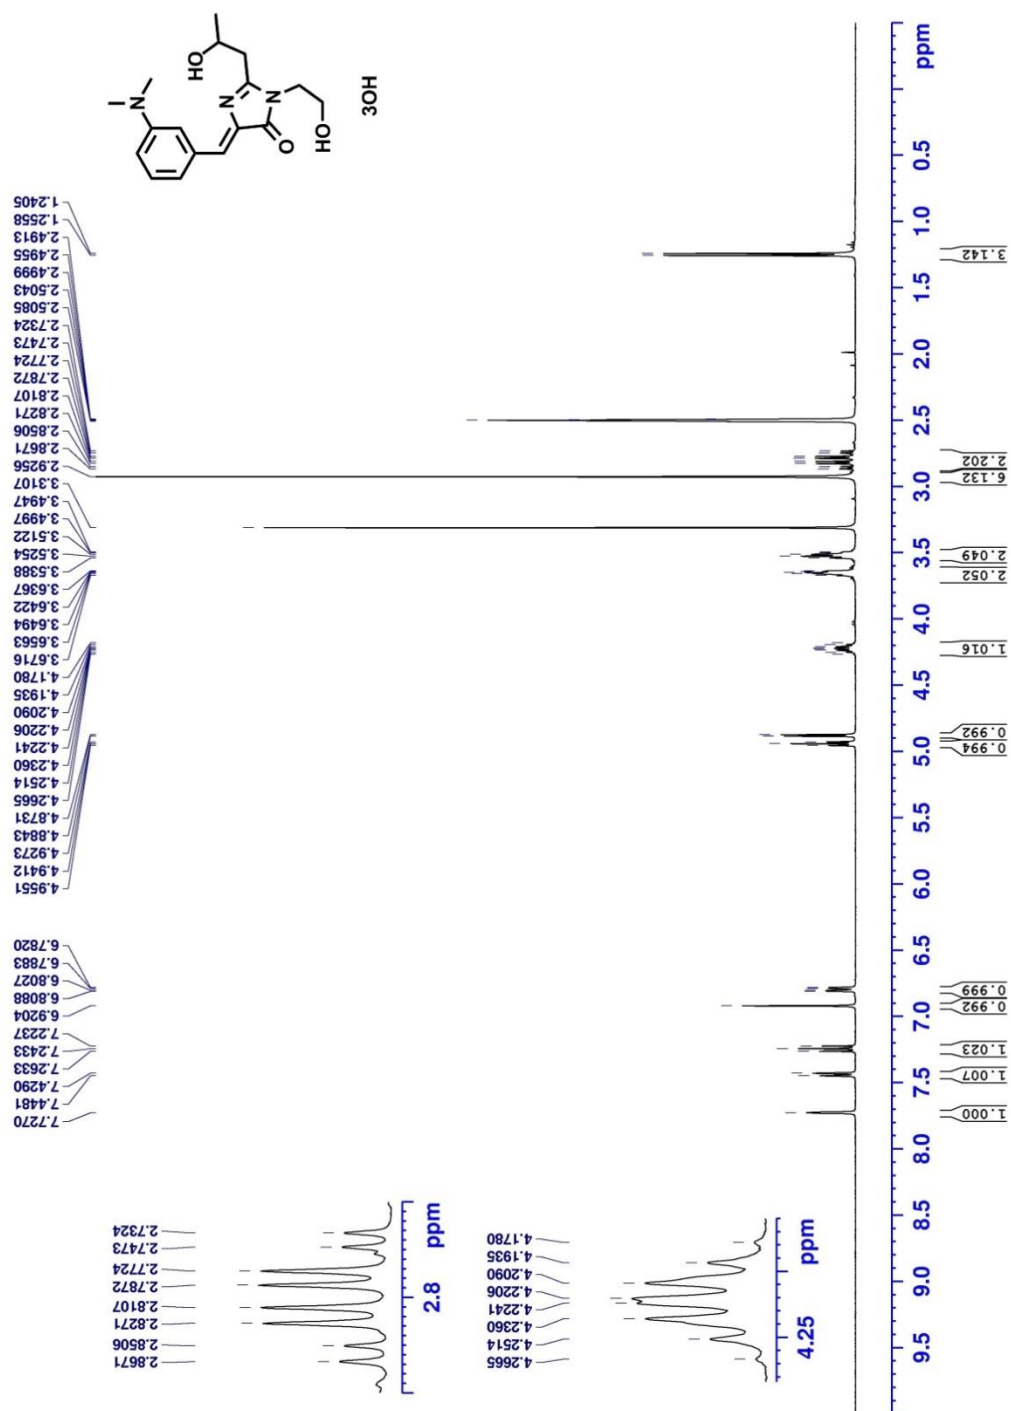

**Figure S8.**  $^{13}\text{C}$  NMR spectra of **3OH** in  $\text{DMSO-}d_6$ .

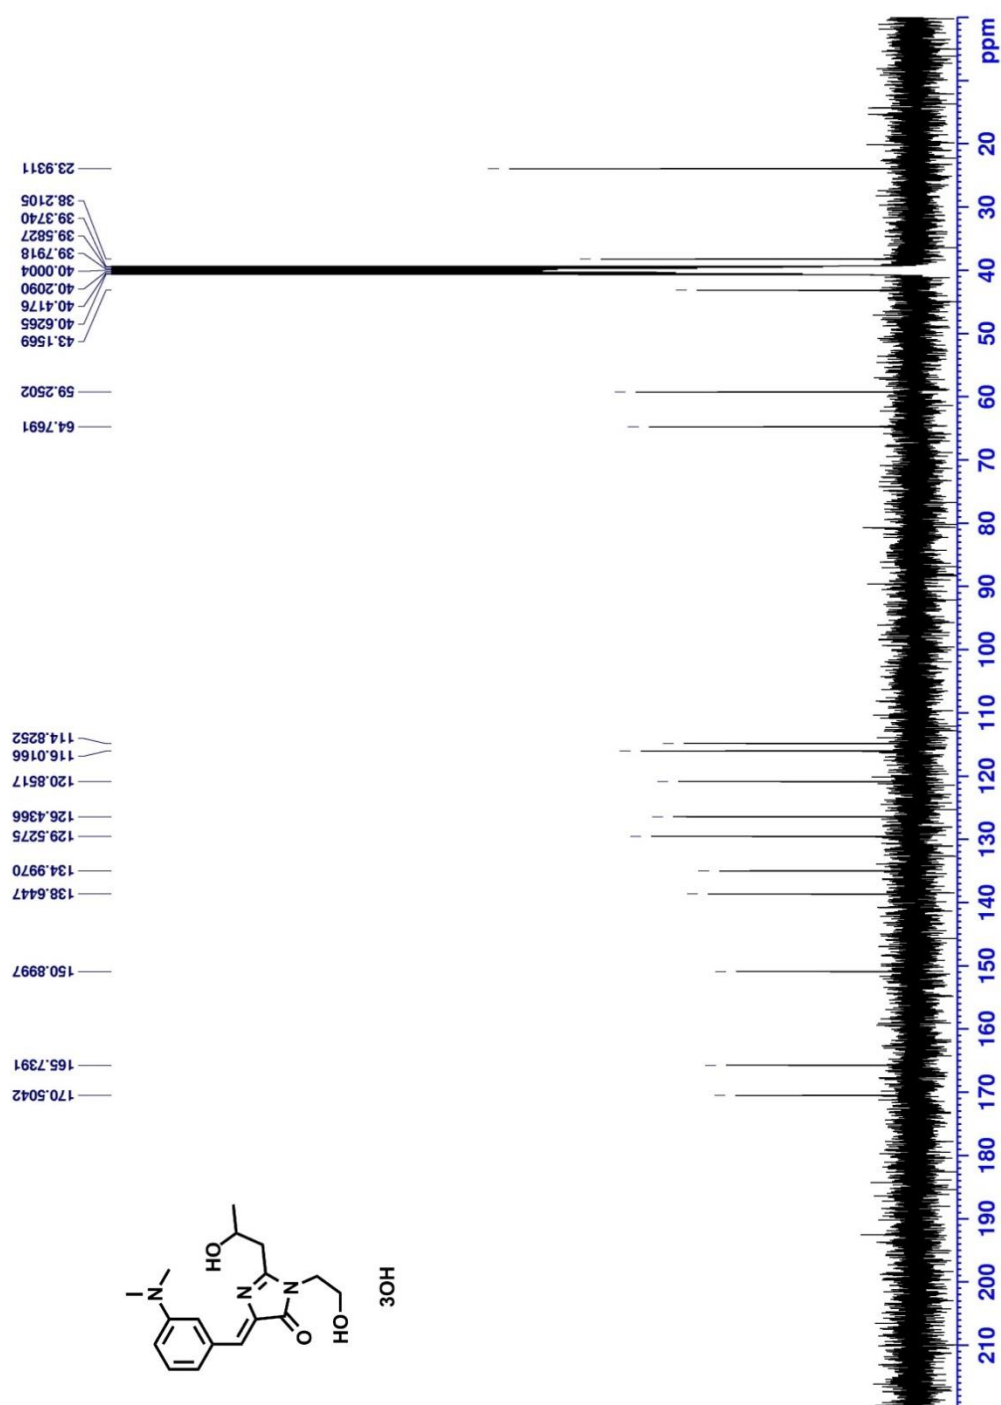

Supplement: Supplementary file 1 [file 3730663]
